1

2

3

**4Spatiotemporal analysis of human rabies exposure in Colombia during ten**  
**5years: A challenge for implementing social inclusion in its surveillance and**  
**6prevention**

7

8

9Arias Caicedo, Marcela Rocío<sup>1\*</sup>; Xavier, D. A.<sup>1</sup>; Arias Caicedo, Catalina Alejandra<sup>2</sup>; Andrade,  
10E.M.<sup>3</sup>; Abel, I<sup>1</sup>.

11

12

13

14<sup>1</sup>Laboratório de Epidemiologia e Geoprocessamento, Programa de Pós-Graduação em Saúde  
15Animal na Amazônia, Universidade Federal do Para, Castanhal, Para, Brasil.

16

17<sup>2</sup>Dirección de Vigilancia y Análisis de Riesgo en Salud Pública, Instituto Nacional de Salud de  
18Colombia, Bogotá D.C., Colombia.

19

20<sup>3</sup>Laboratório de Epidemiologia e Geoprocessamento, Programa de Pós-Graduação em Estudos  
21Antrópicos da Amazônia, Universidade Federal do Pará, Castanhal, Pará, Brasil.

22

23

24\*E-mail: [maroarca01@yahoo.com](mailto:maroarca01@yahoo.com)

1

2

## 25Abstract

26Based on reported cases of human rabies exposure to Colombia public health surveillance system  
27between 2007 and 2016 we conducted a spatiotemporal analysis to identify epidemiological  
28scenarios of human rabies exposure by dog, cat, bat or farm animal (n= 666,411 cases).  
29Spatiotemporal analysis, incidence rate, cluster and outlier analysis were conducted for all  
30Colombian cities (n= 1122). The incidence rate of human rabies exposure by dogs and cats  
31showed an increasing trend while aggression by bats and farm animals fluctuated throughout the  
32analyzed period. Human rabies transmitted by cat and bat occurred in Andean and Orinoquia  
33region, where the larger scenario was observed. There, urban scenario showed high risk to human  
34rabies exposure by cat and dog in cities characterized for having the highest human population  
35density and greater economic development. In contrary, rural area where was observed high risk  
36of human rabies exposure by farm animals in workers from agroforestry area (42.7%). exposed to  
37rabies by contact of mucosa or injured skin with saliva infected with rabies virus (74.5%)  
38composed rural scenario. In Inequality scenario, exposure by farm animals showed some outlier  
39cities with high risk principally in Pacific region, where was observed the lowest incidence rates  
40to human rabies exposure in all years studied and the highest poverty rates in Colombia. There,  
41afro-descendant (55%) and indigenous (8.2%) people were mostly affected. High risk of  
42exposure by bat bite was observed in indigenous (98.5%) located in cities of Amazon region with  
43dispersed population (Amazonian scenario). Analysis presented here can encourage surveillance,  
44care and prevention programs to focus both on ethnic, dispersed populations and areas with rabies  
45viral circulation, since each scenario requires different approach strategies.

46

## 47 Author Summary

48 Worldwide, rabies is transmitted by saliva contact contaminated with the rabies virus through a  
49 bite, scratching or licking of bat, dog, cat and other mammals. If disease is not treated in time is  
50 going to cause death. In Colombia, 14 deaths have been reported due to Classical Rabies Virus  
51 (RABV) in the last 10 years, but no spatial analysis has been carried out to determine different  
52 geographical risk factors. In this study, we analyzed people who were exposed to RABV or died  
53 between 2007 and 2016, showing a relationship between age group, sex, occupation, ethnicity  
54 and illness. Considering these variables were possible to identify four different epidemiological  
55 scenarios where high migratory effect of the population takes the animals to areas with high  
56 population densities and also detect municipalities with very poor and vulnerable populations,  
57 located far from the health centers increasing the risk to die by rabies virus. Another contribution  
58 is the location of human rabies exposure in distinctly agricultural or indigenous areas, where  
59 exposure is clearly high and worrying.

60

## 61 Introduction

62 Rabies is an infectious disease known around the world for its transmission through dog bite to  
63 human, being the cause of viral encephalitis of high mortality in humans. Rabies virus belong to  
64 order *Mononegavirales*, family *Rhabdoviridae*, genus *Lyssavirus*, and genotype 1[1]. It is  
65 believed that RABV appeared more than 4000 years ago with the bat as a reservoir and in its  
66 evolutionary process was adapted to each geographical area and to new hosts. [2]. Probably  
67 RABV and its transmission by dog bites, is the most heard news and the greatest interest in the  
68 human population. The numbers also support this type of transmission as the main global risk;  
69 with 95% of deaths due to human rabies caused by dog bites, mainly in the African and Asian

70continents[3,4]. A remaining 5% of human deaths from rabies are caused by wild animal's bites  
71and are of high concern in public health, especially in the Americas, where they are considered as  
72the main transmitters of the disease [5]. The wild animal most important in South America is  
73hematophagous bats in the Amazon region comprised by Brazil, Peru, Ecuador, French Guiana,  
74Suriname and Colombia[6]. Human rabies transmitted by bat bites is more recent, mainly  
75occurring outbreaks in highly vulnerable human populations [7] and in areas where  
76geographically exist the hematophagous bat species that are only found in America: *Desmodus*  
77*rotundus*, *Dyphilla ecaudata* and *Diaemus young* [8].

78Historically; Colombia, like other countries of Latin America, presented outbreaks of human  
79rabies caused by dog bite, showing a considerable decrease from 1981 to 2004 [9]. Between 2005  
80and 2006; Chocó department reported 14 human deaths in indigenous population and three in  
81Afro-descendant communities, all by bat bites and bat variants. After 2005, human deaths by  
82rabies have been mainly caused by bat variant transmitted by bat and domestic cat [10,11]. From  
832004 to 2016, there were 33 deaths due to rabies in Colombia. Of these, 8 (24.2%) were attacked  
84by cats, 21 (63.6%) by bats and 4 (12.1%) by dogs. The variants found were correlated in cases  
85of aggression by cat and bat to variants belonging to bats (V4, V3 and atypical) and bites to dog  
86variants (V1)[9]. The most recent case of human rabies in Colombia occurred in 2017. It was  
87related to cat aggression confirming the transmission of the atypical variant related to bat[9].

88To prevent human rabies and to monitor rabies exposure, Colombian government uses a  
89surveillance system in public health (SIVIGILA) where it is possible to obtain information for  
90control and prevention action realized by National Health Institute (INS) and Health and Social  
91Protection Ministry (MSPS). Control and prevention are focus on public politics generalized for  
92entire country impacting mainly large areas of population concentration and not integrating the

93complexity of the Colombian territory [12]. On the other hand, studies of distribution and spatial  
94analysis of human rabies or rabies exposure in humans in Colombia are few but frequently found  
95about livestock rabies [13,14].

96Spatial analysis help to understand behavior of diseases in a geographic view to identify  
97information on significant clusters and the associated factors [15]. Based on the reported cases of  
98exposure to rabies in humans by SIVIGILA between 2007 and 2016, we conducted a  
99spatiotemporal analysis to identify epidemiological trends and areas of high risk of being attacked  
100by a dog, cat, bat or having contact with a production animal diagnosed with RABV. Then we  
101determined scenarios of epidemiological risk characterized by their sociodemographic conditions  
102that expose population to RABV to make difference in prevention programs where effective  
103resource utilization and social inclusive becoming relevant.

104

## 105**Materials and Methods**

### 106**Study area**

107 Colombia is located at northwest of the southern region of American continent with a  
108population of 49,291,609 and an area of 1,143,407 km<sup>2</sup>; divided into 33 departments included  
109Bogotá D.C. and subdivided into 1122 cities (1102 municipalities and 20 non-municipalized  
110areas called *corregimientos*) [16] Cities are organized into six regions: Amazonian, Andean,  
111Orinoquia or Eastern plains, Caribbean, Pacific and Insular regions classified according to  
112topography, biota, soil type, vegetation and geology [17] (**figure 1**).

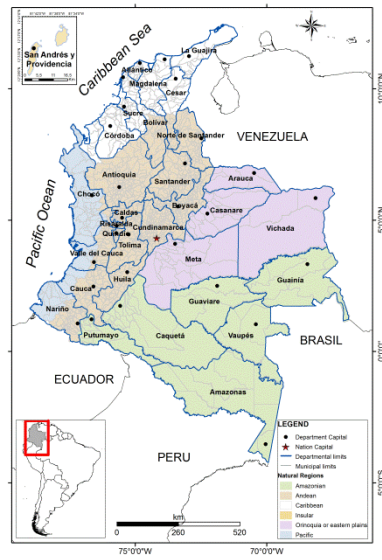

113

114 **Figure 1. Political Division and Natural Regions of Colombia.** Amazonian region (green),  
115 Orinoquia region (violet), Andean region (brown), Pacific region (blue), Caribbean region  
116 (white) and Insular region (orange).

### 117 **Data collection and analysis**

118 Data of reported cases of human rabies exposure since 2007 to 2016 were obtained from  
119 SIVIGILA. For the analysis, we used demographic information (age, sex, occupation and  
120 ethnicity) and rabies exposure information (city where aggression or contact occurred, aggression  
121 type, aggressor species, patient final condition and variant detected), classified according to  
122 Rabies surveillance protocol [18]. Reported human rabies cases and variant detected were  
123 confirmed from final report of human rabies in Colombia in 2016 [9]. Data without the aggressor  
124 species, aggressions by other animals and also people who was exposed to rabies in a different  
125 country were excluded (12,232 cases related). For each variable the number of valid cases varied  
126 since only the correctly filled fields were considered, resulting in 666,411 valid cases.

127 For descriptive statistical analysis, ages were categorized by ten-year intervals, occupations were  
128 categorized according to International Standard Industrial Classification of All Economic

129Activities (ISIC) adapted to Colombia DANE [19]. Gender, area and ethnicity remained  
130classified as found in the Rabies surveillance protocol [18]. All data were inserted and analyzed  
131in the IBM SPSS® software version 20.0, Univariate analysis was performed and considered  
132significant when  $p < 0.05$ . Aggressor species was considered as a dependent variable.

### 133Spatiotemporal analysis

134The population distribution file by year/municipalities [20] and Colombia municipalities shape  
135file were obtained from Colombian National Department of Statistics (DANE)[16] and used as a  
136basis for spatial analysis.

137The incidence means of human rabies exposure by dog, cat, bat and farm animals were estimated  
138and included in the spatiotemporal analysis (incidence rate of human rabies exposure by  
139aggressor species/100,000 hab. and incidence rate of human rabies exposure/year/100,000 hab.).  
140The incidence rates was subdivided in levels according to quartiles (Q), denominated: 0: No  
141incidence; Q1: Low incidence; Q2: Moderate Incidence; Q3: High Incidence and Q4: Very high  
142Incidence [21].. Maps were confectioned in ArcGIS® 10.3 software and temporal graphics were  
143developed in Microsoft Excel 2010.

144In relation to the spatial statistical analysis, Moran's global index and the spatial autocorrelation  
145by Cluster and Outlier Analysis Anselin Local Moran's I were realized for determining the  
146statistically significant clusters and outliers ( $P < 0.05$ ) of human rabies exposure by aggressor  
147species. [22,23], both analyzes were conducted in ArcGIS® 10.3 software.

148

## 149Results and Discussion

## 150 Descriptive statistics

151 Between 2007 and 2016 incidence ranges of human rabies exposure increased from 40.9/100,000  
 152 hab. in 2007 to 234.90/100,000 hab. in 2016. Human rabies exposure by dog was the most  
 153 reported with 58,613/666,304 cases (87.4%) following by cat with 73,272/666,304 cases  
 154 (10.9%). All variables showed a significant difference in relation to aggressor species (table 1).  
 155 The age group more frequently exposed to human rabies was 0-9 years old, especially after being  
 156 bitten by a dog. In less proportion, human's rabies exposure by cats and bats was also more  
 157 frequent to 0-9 years old while for farm animals 30-39 years was more reported. Although most  
 158 rabies exposure cases occur in men, principally in human rabies exposure by dog, women were  
 159 more exposed to human rabies by cat with 61% of cases reported of all cases of human rabies  
 160 exposure by cat (44,811/73,281). Student was the occupation more reported (35.5%-  
 161 236,372/666,304) and bite was the more frequent aggression type (89.6% - 601,178/666,304).  
 162 Within the ethnic population reported, afro-descendant population was the most affected (3.9%  
 163 26,344/666,411), principally by human rabies exposure by dog, however representing less than  
 164 5% of the total population exposed to human rabies (3.5% - 23,180/666,304).

165 **Table 1. Aggressor species distribution according to independent variables of human rabies**  
 166 **exposure in Colombia (2007-2016).**

| VARIABLES             | AGGRESSOR SPECIES |        |          |       |         |       |              |       | p value |
|-----------------------|-------------------|--------|----------|-------|---------|-------|--------------|-------|---------|
|                       | DOG               |        | CAT      |       | BAT     |       | FARM ANIMALS |       |         |
| <b>AGE N= 666,304</b> | n=582,539         | (%)    | n=73,272 | (%)   | n=3,051 | (%)   | n=7,442      | (%)   | 0.000   |
| 0 -9 year             | 157,018           | (23.6) | 14,670   | (2.2) | 589     | (0.1) | 819          | (0.1) |         |
| 10-19 years           | 126,489           | (19.0) | 11,709   | (1.8) | 576     | (0.1) | 1,254        | (0.2) |         |
| 20-29 years           | 77,776            | (11.7) | 10,778   | (1.6) | 559     | (0.1) | 1,287        | (0.2) |         |
| 30-39 years           | 58,487            | (8.8)  | 8,156    | (1.2) | 366     | (0.1) | 1,303        | (0.2) |         |
| 40-49 years           | 51,574            | (7.7)  | 8,371    | (1.3) | 327     | (0.1) | 1,171        | (0.2) |         |
| 50-59 years           | 47,946            | (7.2)  | 8,025    | (1.2) | 311     | (0.0) | 838          | (0.1) |         |



|                                                                                                                      |                |              |             |             |       |
|----------------------------------------------------------------------------------------------------------------------|----------------|--------------|-------------|-------------|-------|
| 60-69 years                                                                                                          | 33,136 (5.0)   | 5,525 (0.8)  | 167 (0.0)   | 517 (0.1)   |       |
| 70-79 years                                                                                                          | 21,133 (3.2)   | 3,822 (0.6)  | 112 (0.0)   | 184 (0.0)   |       |
| 80 years and over                                                                                                    | 8,980 (1.3)    | 2,216 (0.3)  | 44 (0.0)    | 69 (0.0)    |       |
| <b>GENDER N= 666,411</b>                                                                                             | n=582,636      | n=73,281     | n=3,051     | n=7,443     | 0.000 |
| Female                                                                                                               | 253,919 (38.1) | 44,811 (6.7) | 1,267 (0.2) | 1,949 (0.3) |       |
| Male                                                                                                                 | 328,717 (49.3) | 28,470 (4.3) | 1,784 (0.2) | 5,494 (0.8) |       |
| <b>AGRESSION TYPE</b>                                                                                                |                |              |             |             | 0.000 |
| <b>N= 666,411</b>                                                                                                    |                |              |             |             |       |
| Bite                                                                                                                 | 536,277 (80.5) | 581,71 (8.7) | 2,811 (0.4) | 3,919 (0.0) |       |
| Scratch                                                                                                              | 443,54 (6.7)   | 14,857 (2.2) | 188 (0.0)   | 224 (0.0)   |       |
| Contact of mucosa or skin injured with saliva infected with rabies virus                                             | 1,655 (0.2)    | 160 (0.0)    | 28 (0.0)    | 2,262 (0.0) |       |
| Contact of mucosa or injured skin, with nervous tissue, biological material or secretions infected with rabies virus | 101 (0.0)      | 36 (0.0)     | 10 (0.0)    | 793 (0.0)   |       |
| Inhalation in charged environments or rabies virus                                                                   | 4 (0.0)        | 1 (0.0)      | 1 (0.0)     | 13 (0.0)    |       |
| Transplant of organs or tissues infected with rabies virus                                                           | 1 (0.0)        | 1 (0.0)      | 0 (0.0)     | 3 (0.0)     |       |
| Other                                                                                                                | 244 (0.0)      | 55 (0.0)     | 13 (0.0)    | 229 (0.0)   |       |
| <b>OCUPATION N=666,411</b>                                                                                           |                |              |             |             | 0.000 |
| Student                                                                                                              | 210,340 (31.6) | 22,898 (3.4) | 959 (0.1)   | 2,175 (0.3) |       |
| Housewife                                                                                                            | 84,658 (12.7)  | 13,954 (2.1) | 418 (0.1)   | 1,025 (0.2) |       |
| Underage                                                                                                             | 55,839 (8.4)   | 6,290 (0.9)  | 303 (0.0)   | 640 (0.1)   |       |
| Professionals, technicians and others from the agroforestry and livestock area                                       | 26,511 (4.0)   | 2,574 (0.4)  | 144 (0.0)   | 1,171 (0.2) |       |
| Professionals, technicians and others in organization, financial analysis and related                                | 16,692 (2.5)   | 2,647 (0.4)  | 91 (0.0)    | 175 (0.0)   |       |
| Professionals, technicians and workers of the biological sciences, medicine and health                               | 13,975 (2.1)   | 2,275 (0.3)  | 102 (0.0)   | 207 (0.0)   |       |
| Model, seller and demonstrator                                                                                       | 13,232 (2.0)   | 1,889 (0.3)  | 64 (0.0)    | 114 (0.0)   |       |
| Officers, workers and operators of mining, construction and transport                                                | 11,125 (1.7)   | 1,220 (0.2)  | 69 (0.0)    | 138 (0.0)   |       |
| Pensioner                                                                                                            | 7,511 (1.1)    | 1,156 (0.2)  | 60 (0.0)    | 98 (0.0)    |       |
| Unemployed                                                                                                           | 8,685 (1.3)    | 1,164 (0.2)  | 42 (0.0)    | 80 (0.0)    |       |
| Others                                                                                                               | 134,068 (20.1) | 17,214 (2.6) | 799 (0.1)   | 1,620 (0.2) |       |
| <b>ETHNICITY N=666411</b>                                                                                            |                |              |             |             | 0.005 |
| Indigenous                                                                                                           | 10,409 (1.6)   | 748 (0.1)    | 460 (0.1)   | 388 (0.1)   |       |
| Romany                                                                                                               | 1,474 (0.2)    | 193 (0.0)    | 4 (0.0)     | 26 (0.0)    |       |

|                                 |                |               |             |             |
|---------------------------------|----------------|---------------|-------------|-------------|
| Raizal                          | 1,870 (0.3)    | 202 (0.0)     | 16 (0.0)    | 40 (0.0)    |
| Palenquero                      | 241 (0.0)      | 23 (0.0)      | 1 (0.0)     | 2 (0.0)     |
| Afrodescendant                  | 23,180 (3.5)   | 2,144 (0.3)   | 300 (0.0)   | 720 (0.1)   |
| Population without ethnic group | 545,462 (81.9) | 69,971 (10.5) | 2,270 (0.3) | 6,267 (0.9) |

167Univariate analyses considered significant when  $p < 0.05$ . Aggressor species was considered as a  
168dependent variable

169

## 170Temporal Analyses

171The incidence rate of rabies exposure by dogs, cats, farm animals and bats can be seen in figure  
1722. While human rabies exposure to companion animals increased from 2007 to 2016; being the  
173highest incidence presented in 2016 for rabies exposure by dog (203.81 x 100.000 Hab.) (Figure  
1742A), the incidence rate of rabies exposure by bat and farm animals fluctuated throughout the  
175period analyzed with peaks occurring in 2007 (1.33x 100,000 Hab.), 2011 (0.68 x 100,000 Hab.)  
176and 2015 (0.79 x 100,000 Hab.) for rabies exposure by bat and 2010 (1.73 x100,000 Hab.) and  
1772014 (2.19 x 100,000 Hab.) for rabies exposure by farm animals (Figure 2B). It is possible that  
178human rabies exposure by dog and cat showed a trend to increase as a result of dog and cat  
179population's growth in Colombia [24,25] principally in urban areas. The incidence of human  
180rabies exposure by farm animals and bat may have fluctuated for two reasons. First, notification  
181of exposure to farm animals occurs when a person at risk of becoming infected with rabies virus  
182is identified. Usually when one animal is confirmed with rabies virus both human health public  
183surveillance system and animal health surveillance system do an active search of people who was  
184in contact with the animal. In fact, human rabies exposure by farm animal showed similar trend  
185than focus of animal rabies in Colombia during the same period of time [26,27]. Second, human  
186rabies exposure by bat usually is difficult to be notified because people affected live and work in  
187rural areas far from health centers [28].

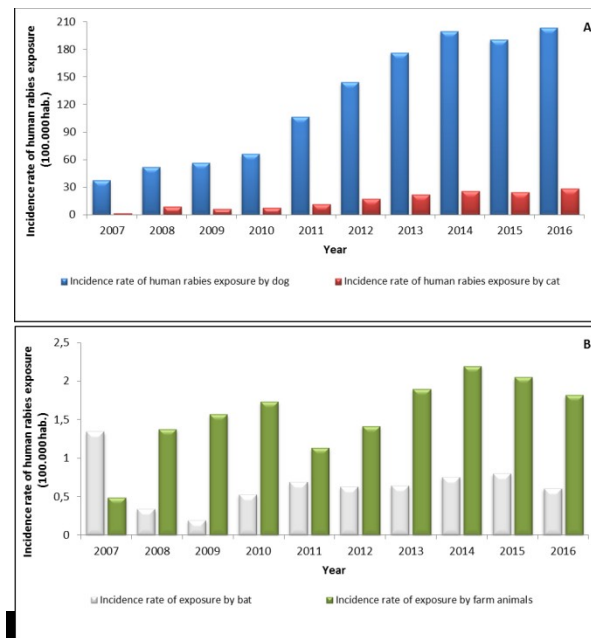

188

189**Figure 2. Temporal distribution of incidence rate of human rabies exposures by dog, cat,**  
190**bat and farm animals x 100.000 Hab. in Colombia, 2007-2016. (A) Incidence rates and cases**  
191**of human exposure by cat and dog. (B) Incidence rates and cases of human exposure by farm**  
192**animals and bat.**

193Overall incidence rate of human rabies exposure showed an increase in all cities in the period  
194analyzed (figure 3). The lowest incidence rate was observed in most of the cities of Chocó  
195department during every year studied (25/30 municipalities between 0 and 21.3/100,000 hab.).  
196This area also presented the highest multidimensional and monetary poverty rates and the  
197lowest index of access to health service in Colombia during the study period [29]. So this low  
198incidence could be the result of a population with high vulnerability that may not be receiving  
199medical attention for their levels of poverty and difficult access to health. [7] Indeed, some cities  
200of Amazonas, Guainia and Chocó departments registered absence of incidence during all period  
201analyzed.

202 Human deaths by rabies transmitted by dog bite occurred in 2007, when two cases were notified  
203 in Magdalena city (Caribbean region) with V1 variant involved (figure 3A). This region did not  
204 have an increase as would be expected in incidence rate of human rabies exposure in the first  
205 years of analysis in spite of having presented cases of human rabies. Four human deaths by rabies  
206 transmitted by bat bite occurred in cities of Andean and Orinoquia region, with the V3 and the V  
207 atypical variants registered between 2007 and 2010 (Figure 3A, B, C, D). Ten human deaths by  
208 rabies transmitted by cat were recorded in cities of Andean region, with the V3, V4 and V  
209 atypical variants for the years 2008-2010, 2012, 2015 and 2016 (figure 3B, C, D, F, I, J).

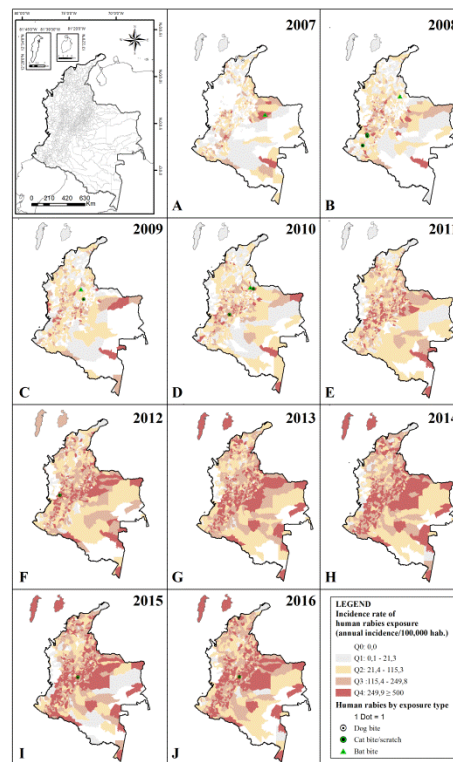

210

211 **Figure 3. Spatiotemporal distribution of incidence rates of human rabies exposure and**  
212 **human deaths by rabies in Colombia (2007-2016).** Incidence rates of human rabies exposure  
213 and cases of human rabies by animal aggressor in (A) 2007, (B) 2008, (C) 2009, (D) 2010, (E)  
214 2012, (G) 2013, (H) 2014, (I) 2015, (J) 2016. Colored dot of human rabies by aggressor specie

215representing variant involved: White for V1 variant of dog and Green for variants of bat (V3, V4  
216and atypical).

## 217Spatial Analyses

218Geographic distribution of incidences rates of human rabies exposure by dog and cat showed a  
219concentration from moderate to very high in municipalities located in Andean Region, north of  
220the Orinoquia region and some municipalities of the Amazon and Caribbean region (Figure 4A  
221and B). Low incidences were present in some cities located in Pacific, Amazon and Caribbean  
222region. Very high, high, moderate and low incidence ranges of human rabies exposure by bat and  
223farm animals were observed in all regions (Figure 4C and D). The highest incidence rate of rabies  
224exposure among all animals' species was observed in exposure by bat in Taraira municipality of  
225Vaupés Department, Amazon region (1,100.5/100,000 Hab.).

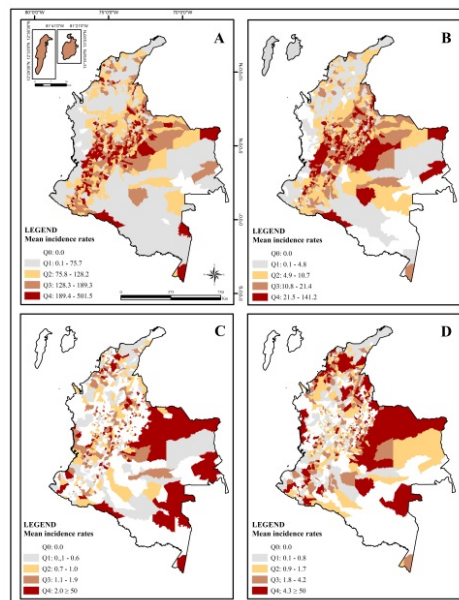

226

227**Figure 4. Spatial distribution of the mean incidence of human rabies exposure by aggressor**

228**species from 2007 to 2016 in all 1122 Colombian cities. (A) Mean incidence rates of human**

25

13/ 31

26

229rabies exposure by dog (B) Mean incidence rates of human rabies exposure by cat (C) Mean  
230incidence rates of human rabies exposure by bat. For this map section, Q4 presents 3 cities with  
231incidence between 50 and 1,100/100,000 hab. (D) Mean incidence rates of human rabies  
232exposure by farm animals. For this map section, Q4 presents 10 cities with incidents between 50  
233and 142.8/100,000 hab. Incidence levels according quartiles (Q): Q0 - No incidence; Q1 - Low  
234incidence; Q2 - Moderate incidence; Q3 - High incidence and Q4 - Very high incidence.

235Moran's global index indicated significant spatial clustering of incidence rates for all aggressor  
236species (Dog exposure Moran's  $I=0.006$  z-score: 77.9 p-value 0.000, Cat exposure Moran's  $I=$   
2370.07465 z-score:93.3 p-value 0.000, Bat exposure Moran's  $I=0.0036$  z-score:7.284 p-value 0.000  
238and Farm animals exposure Moran's  $I=0.0140$  z-score:18.66 p-value 0.000). High-High cluster  
239was observed mainly for human rabies exposure by dog (Figure 5A), cat (Figure 5B) and farm  
240animals (Figure 5D) in cities of Andean and Orinoquia region and few cities in Amazonian  
241region. In Caribbean region registered only high-high clustering for farm animals (Figure 5D)  
242and some outliers High-Low for dog exposure (Figure 5A). Pacific region recorded outliers High-  
243Low for farm animal's exposure, specifically in Chocó department (Figure 5D). Cluster High-  
244High for bat exposure was exclusive in cities of Vaupés department (Amazon region) (Figure  
2455C), moreover, were observed two High-low outliers for dog exposure (Figure 5A). All Low-  
246Low clusters were observed in the Caribbean, Amazonian and north part of Pacific region in  
247human rabies exposure by dog and cat (Figure 5A and 5B). In Low-Low cluster of human rabies  
248exposure by dog occurred in Caribbean region with two human deaths related to dog aggression  
249(Figure 5A), all deaths by human rabies transmitted by bat bite occurred in cities without  
250statistical significance for human rabies exposure by bat (Figure 5C) and all deaths by human

251rabies transmitted by cat bite or scratch occurred in cluster High-High for human rabies exposure

252by bat located in Andean region (Figure 5B).

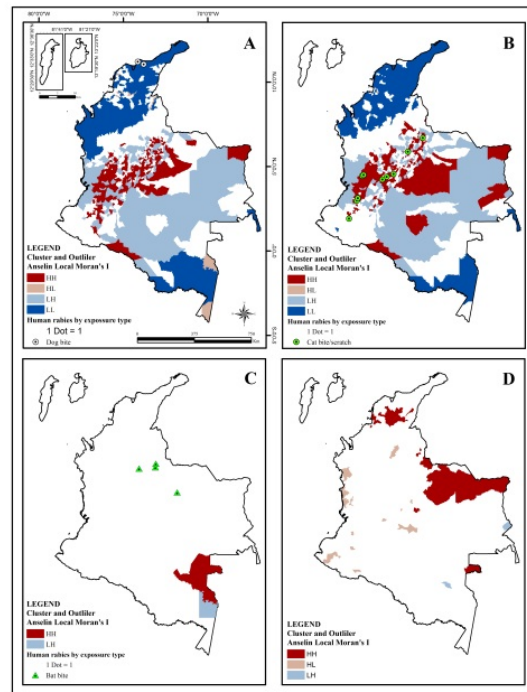

253

254**Figure 5. Distribution of Cluster and Outlier Analysis Anselin Local Moran's I for human**  
255**rabies exposure by aggressor specie and human rabies according to exposure type in**  
256**Colombia (2007-2016).** (A) Cluster and Outlier Anselin Local Moran's I for human rabies  
257exposure by dog with human rabies transmitted by dog bite. (B) Cluster and Outlier Anselin  
258Local Moran's I for human rabies exposure by cat with human rabies transmitted by cat bite or  
259scratch. (D) Cluster and Outlier Anselin Local Moran's I for human rabies exposure by bat with  
260human rabies transmitted by bat bite. (E) Cluster and Outlier Anselin Local Moran's I for human  
261rabies exposure by farm animals. Cluster and Outlier levels according to Anselin Local Moran's I  
262classification: HH (High-High Cluster), HL (High-Low Outlier), LH (Low-High Outlier) and LL  
263(Low-Low Outlier). Colorless areas have no statistical significance. Colored dot of human rabies



264representing variant involved: White for V1 variant of dog and Green for variants of bat (V3, V4  
265and atypical).

266Cluster and Outlier Analysis Anselin Local Moran's I showed various scenarios of high-risk  
267exposure of human to rabies by animal aggressor (Figure 6) (table 2). Urban Scenario presents  
268the high risk of human rabies exposure by cat and dog observed in cities with the highest  
269population density of Amazon, Andean and Orinoquia region. In this scenario, women presented  
270the highest risk of rabies exposure to cat (61%) and students presented high risk to be exposed to  
271dog (35.7%) and cat (26.1%) aggression. The most frequent aggression type was bite by dog with  
27292% (168,224/181,540) and children of 0 to 9 years old composed de age group more frequently  
273aggressed. All rabies human deaths caused by cat and bat aggression were registered in this  
274scenario. This situation is similar worldwide where dog bite is the most reported in children and  
275women more reported by cat bite [30]. Andean region reported the highest human population  
276growth and the highest population density which would explain the greater concentration of  
277animals in this region. Additionally, Andean and Orinoquia region reported the lowest  
278multidimensional and monetary poverty rates and the highest index of access to health service in  
279Colombia during the study period [29] showing a greater opportunity to receive medical attention  
280and to notify in surveillance system when a human rabies exposure occurs. Human rabies  
281transmitted by cat and bat bite could have increased the reports of human rabies exposure by cat  
282and dog in this area like a population response to education programs and TV news about rabies.  
283Basically, it happens in urban area of Andean and Orinoquia region because there is better access  
284to information and because there all human deaths by rabies caused by cat and bat occurred in the  
285time analyzed. Here we observed as important to stand out how the cat makes a difference in  
286rabies transmission, becoming the main transmitter of wild rabies variants to humans in



287Colombia [11–13], different to others countries which are usually transmitted by bat bite [34].  
288This is probably happening by the urban expansion in Andean and Orinoquia region that have  
289modified the use of peri-urban and rural land. Two phenomena can be observed there: large  
290population migrations to peripheral areas in search of job and low land costs for urbanization; and  
291a high demand of rural land near Colombian principal large cities for construction of country  
292houses and places to tourist and recreational activities [35,36]. In this urban-rural transition zone,  
293the cat is in close contact with bats that inhabits Andean and Orinoquia region mainly in  
294municipalities with less density population, where four humans' rabies deaths occurred by bat  
295bite [9]. In these cities with dispersed population of rural area of Andean, Orinoquia and  
296Caribbean region the rural scenario was observed. In this, a high-risk of human rabies exposure  
297by farm animals was observed mainly among professionals, technicians and workers from the  
298agroforestry and livestock area (42.7% - 957/2,241), presenting 30 to 39 years old (21.6% -  
299485/2,241), with the most frequent aggression type contact of mucosa or skin injured with saliva  
300infected with rabies virus (74.5% - 1,669/2,241). They were located principally in rural area  
301(70.5% - 1,570/2,241) of cities with dispersed population (8.0 Hab./km<sup>2</sup>) of Orinoquia (1.4% -  
30216/1,122), Andean (0.8% - 9/1,122) Caribbean region (2% - 22/1,122), and Amazon region  
303(0.1% - 1/1,122). In the period studied, Orinoquia and Caribbean region presented the highest  
304livestock population in the country [37,38] and also the distribution of wild rabies outbreaks in  
305farm animals were principally presented in Caribbean, Andean and Orinoquia Region according  
306to Colombian Agricultural Institute (ICA) [39,40] with similar trend to human rabies exposure by  
307farm animals [26,27]. This evidences that people affected didn't have proper animals  
308management practices, when these animals present nervous symptomatology or when wild rabies  
309is present near of urban areas[39].

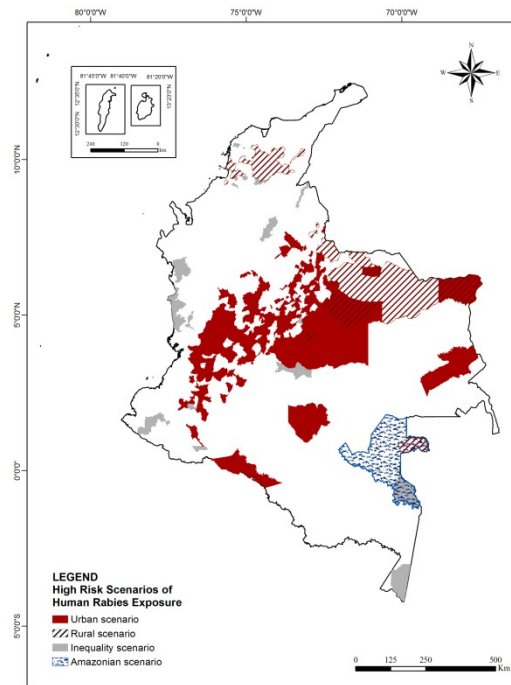

310

311 **Figure 6. High-risk scenarios of Human Rabies exposure in Colombia 2007-2016.**

312 **Table 2. Sociodemographic and geographical description of High Risk Human Rabies**

313 **Exposure by aggressor specie in Colombia 2007-2016.**

| VARIABLES         | AGGRESSOR TYPE |              |              |           |            |              |            |  |
|-------------------|----------------|--------------|--------------|-----------|------------|--------------|------------|--|
|                   | DOG            |              | CAT          |           | BAT        | FARM ANIMALS |            |  |
|                   | HH             | HL           | HH           | HL        | HH         | HH           | HL         |  |
| N= 224,051        | n=181,540 (%)  | n=4,670 (%)  | n=34,370 (%) | n=134 (%) | n=391 (%)  | n=2,241 (%)  | n=705 (%)  |  |
| <b>AGE</b>        |                |              |              |           |            |              |            |  |
| 0 - 9 years       | 47,423 (26.1)  | 1,389 (29.7) | 7,242 (21.1) | 23 (17.2) | 153 (39.1) | 125 (5.6)    | 183 (26.0) |  |
| 10 - 19 years     | 38,636 (21.3)  | 1,090 (23.3) | 5,357 (15.6) | 24 (17.9) | 109 (27.9) | 337 (15.0)   | 158 (22.4) |  |
| 20 - 29 years     | 22,813 (12.6)  | 484 (10.4)   | 4,690 (13.6) | 19 (14.2) | 50 (12.8)  | 407 (18.2)   | 108 (15.3) |  |
| 30 - 39 years     | 18,327 (10.1)  | 446 (9.6)    | 3,730 (10.9) | 15 (11.2) | 26 (6.6)   | 485 (21.6)   | 96 (13.6)  |  |
| 40 - 49 years     | 16,668 (9.2)   | 394 (8.4)    | 3,877 (11.3) | 19 (14.2) | 17 (4.3)   | 417 (18.6)   | 69 (9.8)   |  |
| 50 - 59 years     | 15,868 (8.7)   | 399 (8.5)    | 3,748 (10.9) | 14 (10.4) | 23 (5.9)   | 256 (11.4)   | 50 (7.1)   |  |
| 60 - 69 years     | 11,294 (6.2)   | 238 (5.1)    | 2,694 (7.8)  | 8 (6.0)   | 9 (2.3)    | 152 (6.8)    | 29 (4.1)   |  |
| 70 - 79 years     | 7,412 (4.1)    | 163 (3.5)    | 1,875 (5.5)  | 9 (6.7)   | 4 (1.0)    | 47 (2.1)     | 10 (1.4)   |  |
| 80 years and over | 3,073 (1.7)    | 67 (1.4)     | 1,151 (3.3)  | 3 (2.2)   | 0 (0.0)    | 15 (0.7)     | 2 (0.3)    |  |

|                                                                                                                      |                  |               |                   |              |              |               |               |         |
|----------------------------------------------------------------------------------------------------------------------|------------------|---------------|-------------------|--------------|--------------|---------------|---------------|---------|
| Without information                                                                                                  | 26 (0.0)         | 0 (0.0)       | 6 (0.0)           | 0 (0.0)      | 0 (0.0)      | 0 (0.0)       | 0 (0.0)       | 0 (0.0) |
| <b>GENDER</b>                                                                                                        |                  |               |                   |              |              |               |               |         |
| Female                                                                                                               | 79,932 (44.0)    | 1,853 (39.7)  | 21,019 (61.2)     | 76 (56.7)    | 171 (43.7)   | 357 (15.9)    | 244 (34.6)    |         |
| Male                                                                                                                 | 101,608 (56.0)   | 2,817 (60.3)  | 13,351 (38.8)     | 58 (43.3)    | 220 (56.3)   | 1,884 (84.1)  | 461 (65.4)    |         |
| <b>AGRESSION TYPE</b>                                                                                                |                  |               |                   |              |              |               |               |         |
| Bite                                                                                                                 | 168,224 (92.7)   | 4,238 (90.7)  | 27,227 (79.2)     | 110 (82.1)   | 390 (99.7)   | 470 (21.0)    | 410 (58.2)    |         |
| Scratch                                                                                                              | 12,668 (7.0)     | 412 (8.8)     | 6,985 (20.3)      | 24 (17.9)    | 1 (0.3)      | 34 (15)       | 2 (0.3)       |         |
| Contact of mucosa or skin injured with saliva infected with rabies virus                                             | 639 (0.4)        | 20 (0.4)      | 156 (0.5)         | 0 (0.0)      | 0 (0.0)      | 1,669 (74.5)  | 261 (37.0)    |         |
| Contact of mucosa or injured skin, with nervous tissue, biological material or secretions infected with rabies virus | 6 (0.0)          | 0 (0.0)       | 2 (0.0)           | 0 (0.0)      | 0 (0.0)      | 68 (3.0)      | 32 (4.5)      |         |
| Others                                                                                                               | 3 (0.0)          | 0 (0.0)       | 0 (0.0)           | 0 (0.0)      | 0 (0.0)      | 0 (0.0)       | 0 (0.0)       |         |
| <b>OCUPATION</b>                                                                                                     |                  |               |                   |              |              |               |               |         |
| Student                                                                                                              | 64,770 (35.7)    | 1,926 (41.2)  | 8,978 (26.1)      | 40 (29.9)    | 135 (34.5)   | 324 (14.5)    | 192 (27.2)    |         |
| Housewife                                                                                                            | 26,856 (14.8)    | 721 (15.4)    | 7,928 (23.1)      | 43 (32.1)    | 37 (95)      | 179 (8.0)     | 60 (8.5)      |         |
| Underage                                                                                                             | 17,930 (9.9)     | 442 (9.5)     | 3,271 (9.5)       | 7 (5.2)      | 84 (21.5)    | 64 (2.9)      | 141 (20.0)    |         |
| Professionals, technicians and workers from the agroforestry and livestock area                                      | 9,842 (5.4)      | 375 (8.0)     | 815 (2.4)         | 3 (2.2)      | 66 (16.9)    | 957 (42.7)    | 182 (25.8)    |         |
| Others                                                                                                               | 62,142 (34.2)    | 1,206 (25.8)  | 13,378 (38.9)     | 41 (30.6)    | 69 (17.6)    | 717 (32.0)    | 130 (18.4)    |         |
| <b>ETHNICITY</b>                                                                                                     |                  |               |                   |              |              |               |               |         |
| Indigenous                                                                                                           | 3,184 (1.8)      | 519 (11.1)    | 221 (0.6)         | 0 (0.0)      | 385 (98.5)   | 69 (3.1)      | 58 (8.2)      |         |
| Afrodescendant                                                                                                       | 5,815 (3.2)      | 132 (2.8)     | 993 (2.9)         | 1 (0.7)      | 0 (0.0)      | 105 (4.7)     | 376 (53.3)    |         |
| Others                                                                                                               | 1,260 (0.7)      | 16 (0.3)      | 237 (0.7)         | 0 (0.0)      | 1 (0.3)      | 36 (1.6)      | 3 (0.4)       |         |
| Population without ethnicity                                                                                         | 171,281 (94.3)   | 4,003 (85.7)  | 32,919 (95.8)     | 133 (99.3)   | 5 (1.3)      | 2,031 (90.6)  | 268 (38.0)    |         |
| <b>ZONE</b>                                                                                                          |                  |               |                   |              |              |               |               |         |
| Urban                                                                                                                | 141,926 (78.2)   | 4,026 (86.2)  | 30,564 (88.9)     | 122 (91.0)   | 141 (36.1)   | 671 (29.9)    | 129 (18.3)    |         |
| Rural                                                                                                                | 39,614 (21.8)    | 644 (13.8)    | 3,806 (11.1)      | 12 (9.0)     | 250 (63.9)   | 1,570 (70.1)  | 576 (81.7)    |         |
| <b>MUNICIPALITIES N=1122</b>                                                                                         | 304 (27.1)       | 12 (1.1)      | 282 (25.1)        | 3 (0.3)      | 4 (0.4)      | 47 (4.2)      | 12 (1.1)      |         |
| <b>MUNICIPALITIES BY REGION*</b>                                                                                     |                  |               |                   |              |              |               |               |         |
| Amazonian                                                                                                            | 2 (0.2)          | 2 (0.2)       | 3 (0.3)           | 0 (0.0)      | 4 (0.4)      | 1 (0.1)       | 0 (0.0)       |         |
| Andean                                                                                                               | 277 (24.7)       | 1 (0.1)       | 253 (22.5)        | 0 (0.0)      | 0 (0.0)      | 9 (0.8)       | 5 (0.4)       |         |
| Caribbean                                                                                                            | 0 (0.0)          | 9 (0.8)       | (0.0)             | 3 (0.3)      | 0 (0.0)      | 22 (2.0)      | 0 (0.0)       |         |
| Orinoquia                                                                                                            | 25 (2.2)         | 0 (0.0)       | 29 (2.6)          | 0 (0.0)      | 0 (0.0)      | 16 (1.4)      | 2 (0.2)       |         |
| Pacific                                                                                                              | 0 (0.0)          | 0 (0.0)       | 0 (0.0)           | 0 (0.0)      | 0 (0.0)      | 0 (0.0)       | 4 (0.4)       |         |
| <b>AREA Km<sup>2</sup> N:1,143,407</b>                                                                               | 124,957 (10.9)   | 15,253 (1.3)  | 178,113 (15.6)    | 292 (0.0)    | 41,182 (3.6) | 106,365 (9.3) | 20,985 (1.8)  |         |
| <b>POPULATION** N=46,322,690</b>                                                                                     | 7,896,000 (17.0) | 160,891 (0.3) | 11,873,761 (25.6) | 54,002 (0.1) | 38,001 (0.1) | 852,829 (1.8) | 218,274 (0.5) |         |
| Population Density                                                                                                   | 63.2             | 10.5          | 66.7              | 185.0        | 0.9          | 8.0           | 10.4          |         |

---

\*Insular region was excluded because no municipalities clustering or outlier were observed

\*\*Population mean determined by municipalities and corregimientos of the census projection in Colombia during 2007-2016.

314Inequality Scenario (Figure 6) points to human rabies exposure by dog and farm animal present  
315in outlier cities in Pacific, Andean, Amazonian and Orinoquia region. This scenario is present  
316near the cities which reported the less incidence of human rabies exposure for all studied period,  
317the less incidence for human rabies exposure by cat, dog and bat and also the cities with the  
318highest multidimensional and monetary poverty rates and the lowest index of access to health  
319service in Colombia (Pacific and Caribbean region) [29]. There, students were exposed to dog  
320bite who live in isolated municipalities with dispersed population (10.5 Hab./km<sup>2</sup>) in Caribbean  
321(0.8 % - 9/1122) and Amazonian region (0,2% - 2/1122) with 11.1% (519/4670) belonging to  
322indigenous population. Also students (27.2% - 192/705) were exposed to bite and contact with  
323mucosa or skin injured with saliva of farm animals infected with rabies virus in Pacific region  
324(0.2% - 4/1,122) and Andean region (0.4% - 5/1,122) registering the most frequency in afro-  
325descendant (55% -376/705). Human rabies exposure by dog showed here the efficiency of the  
326epidemiological surveillance system in cities with less density population and low access to  
327health. It is possible that local campaigns focused principally on rabies prevention transmitted by  
328dog bite in these localities. Overall human rabies exposure by farm animals happens due to  
329animal rabies' outbreaks. Population here is different to urban scenario because they are related  
330to ethnic groups that are sustained by agricultural production carried out in forest area principally  
331in Pacific region, who live far from health centers in areas with rabies viral circulation, with high  
332poverty rate, with difficulty access to health information and probably with child labor involved  
333to help in family economy[28]. These characteristics expose them to a high risk to be in contact

334with rabies virus and also answer why they are not looking for medical attention when they are  
335exposed to human rabies by others animals.

336Amazonian Scenario (Figure 6) shows the high risk of human rabies exposure by bats to students  
337(34.5% - 135/391) of indigenous ethnicity (98.5% - 385/391), 0- 9 and 10 -19 years old (39.1%  
338and 27.9%, respectively). These cases were recorded in rural area (63.9% - 250/391) of  
339municipalities with dispersed population (0.9 Hab./km<sup>2</sup>) in Amazon region where only family  
340production systems are found. The increase of incidence rate of human rabies exposure by bat in  
341Amazon region could be related to implementation of the strategy model of surveillance,  
342prevention and control of wild rabies in high-risk communities where a pilot project was  
343conducted with the objective of application of human rabies pre-exposure vaccination scheme in  
344dispersed populations of difficult access in five departments of Colombia during the years 2012  
345to 2015. The report indicated that people who lived in cities with dispersed population in  
346departments of Cauca, Vaupés, Vichada and Nariño received human rabies vaccination and there  
347were finding and notified people attacked by bat [41–43]. The execution of this project gave the  
348opportunity to show a high risk of being exposed to rabies by bat bite in an area where access is  
349difficult, without communication routes, with low access to education and information media,  
350mainly inhabited by indigenous population in the Amazon rainforest and where access to health  
351services is of high cost for population [28] This project was conducted only in Vaupés  
352department of Amazonian region. So, the other cities that showed the most low incidence rates  
353for all type of aggressor animal leave doubts about the real vulnerability of indigenous population  
354who are part of more than 60% of the population present in the Amazon region [28]. This  
355scenario shows an area that may have been displayed to human health surveillance system by a

356non-continuous prevention project realized in populations of difficult access that would be  
357worthwhile to study more thoroughly.

358None high risk scenario of human rabies exposure was related to human rabies cases caused by  
359dog aggression in the cities in Caribbean region. This can be due to the fact that this region is the  
360second place of high multidimensional and monetary poverty rates, where people do not have  
361economic capacity to looking for medical attention added to failures in the health surveillance  
362system related to the second lowest index of access to health service in Colombia [29].

363

## 364**Conclusions**

365Spatiotemporal analysis allowed us to visualize cities and populations with specific  
366characteristics, invisible in other studies reflecting little intervention of the different programs to  
367avoid the spread of the disease out of principal cities in Colombia. Considering animal species  
368aggressor, exposure type, ethnicity and demographic data we realized four epidemiological  
369scenarios for human rabies exposure in Colombia. Since each scenario requires different impact  
370strategies, this analysis can help to better target surveillance, care and prevention programs  
371considering developed social inclusion policies where ethnic, dispersed populations and areas  
372with rabies viral circulation can become relevant.

373Finally, taking in account the results of this study at national level, these analyzes should be  
374conducted at a lower level of geographical division to determine the risk factors inherent to each  
375region, including environmental and economic variables that may show other risks in human  
376rabies exposure.

### 377 **Acknowledgments**

378 We would like to thank Colombian Health National Institute and Colombian Health for sharing  
379 the database; PAEC OEA-GCUB and CAPES for financial support and the researchers PS  
380 Bezerra-Junior, JG Barreto and CCG Moraes for their valuable contributions.

381

382        **References**

3831.        Rupprecht C, Kuzmin I, Meslin F. Lyssaviruses and rabies: current conundrums, concerns,  
384        contradictions and controversies. F1000Research [Internet]. 2017;6(0):184. Available  
385        from: <https://f1000research.com/articles/6-184/v1>
3862.        Babboni S, Modolo J. Raiva : Origem , Importância e Aspectos Históricos Rabies : Origin ,  
387        Importance and Historical Aspects. Cient Ciênc Biol Saúde [Internet]. 2011;349–56.  
388        Available from: [http://pgsskroton.com.br/seer/index.php/JHealthSci/article/viewFile/](http://pgsskroton.com.br/seer/index.php/JHealthSci/article/viewFile/1090/1046)  
389        1090/1046
3903.        Hervé Bourhy, Jean-Marc Reynes, Eleca J. Dunham, Laurent Dacheux, Florence Larrous,  
391        Vu Thi Que Huong, et al. The origin and phylogeography of dog rabies virus. The Journal  
392        of General Virology [Internet]. 2008;76(October 2009):211–20. Available from:  
393        <https://www.ncbi.nlm.nih.gov/pmc/articles/PMC3326349/pdf/nihms368058.pdf>
3944.        Hampson K, Coudeville L, Lembo T, Sambo M, Kieffer A, Attlan M, et al. Estimating the  
395        Global Burden of Endemic Canine Rabies. PLoS Neglected Tropical Diseases [Internet].  
396        2015;9(4):1–20. Available from:  
397        <https://www.ncbi.nlm.nih.gov/pmc/articles/PMC4400070/pdf/pntd.0003709.pdf>
3985.        WHO. WHO | What is rabies? [Internet]. Who. 2016 [cited 2018 Mar 4]. Available from:  
399        <http://www.who.int/rabies/about/en/>
4006.        OPS. Alerta Epidemiologica-Rabia. Epidemiological Alert-Rabies OPS [Internet]. 2014;1–  
401        3. Available from: [https://www.paho.org/hq/dmdocuments/2014/2014-may-05-cha-rabia-](https://www.paho.org/hq/dmdocuments/2014/2014-may-05-cha-rabia-alerta-epi.pdf)  
402        [alerta-epi.pdf](https://www.paho.org/hq/dmdocuments/2014/2014-may-05-cha-rabia-alerta-epi.pdf)



4037. Blancou J. The evolution of rabies epidemiology in wildlife. Atlantic [Internet]. 1995;1–  
404 22. Available from:  
405 [http://www.vetmed.ucdavis.edu/phr/local\\_resources/pdfs/EVOLUTION\\_RABIES\\_EPIDE](http://www.vetmed.ucdavis.edu/phr/local_resources/pdfs/EVOLUTION_RABIES_EPIDE)  
406 [MIOLOGY\\_WILDLIFE.pdf](http://www.vetmed.ucdavis.edu/phr/local_resources/pdfs/EVOLUTION_RABIES_EPIDE)
4078. Johnson N, Aréchiga-Ceballos N, Aguilar-Setien A. Vampire bat rabies: Ecology,  
408 epidemiology and control. *Viruses*. 2014;6(5):1911–28. Available from:  
409 <https://www.ncbi.nlm.nih.gov/pmc/articles/PMC4036541/pdf/viruses-06-01911.pdf>
4109. Instituto Nacional de Salud (INS). Vigilancia integrada de la rabia humana código INS:  
411 307. Informe final, 2016, Integrated surveillance of human rabies INS code: 307. Final  
412 report, 2016 [Internet]. Bogota D.C.; 2017. Available from:  
413 <http://simposiovirologia.ins.gov.co/lineas-de-accion/Subdireccion-Vigilancia/sivigila/>  
414 [Fichas de Notificacin SIVIGILA/Rabia humana F307.pdf](http://simposiovirologia.ins.gov.co/lineas-de-accion/Subdireccion-Vigilancia/sivigila/)
41510. Roncancio-Melgarejo CP, Buitrago-Medina DA, Posada-Zapata IC, Grisales-Romero H.  
416 Exposiciones rábicas en Colombia: evaluación del sistema de vigilancia desde los actores.  
417 Human rabies exposure in Colombia: Evaluation of the surveillance system from the actors  
418 *Revista Facultad Nacional de Salud Pública* [Internet]. 2015;33(3). Available from:  
419 <http://aprendeenlinea.udea.edu.co/revistas/index.php/fnsp/article/view/20343>
42011. Paez A, Polo L, Heredia D, Nuñez C, Rodriguez M, Agudelo C, et al. An outbreak of human  
421 rabies transmitted by a cat in the town of Santander de Quilichao, Colombia, 2008.  
422 2009;11(March 2008):931–43. Available from:  
423 <https://scielosp.org/pdf/rsap/2009.v11n6/931-943/es>
42412. Agudelo-Suárez AN, Villamil-Jiménez LC, Agudelo-Suárez AN, Villamil-Jiménez LC.

- 425 Public policies of zoonoses in Colombia, 1975-2014. An approach from political science  
426 and public health. *Revista de Salud Pública* [Internet]. 2017;19(6):787–94. Available from:  
427 <https://revistas.unal.edu.co/index.php/revsaludpublica/article/view/72109>
42813. Brito-Hoyos DM, Brito EB, Álvarez RV. Geographic distribution of wild rabies risk and  
429 evaluation of the factors associated with its incidence in Colombia, 1982–2010. *Revista*  
430 *Panamericana Salud Pública* [Internet]. 2013;33(1):8–14. Available from:  
431 <http://www.scielosp.org/pdf/rpsp/v33n1/a02v33n1.pdf>
43214. Escobar LE. Spatial epidemiology of bat-borne rabies in Colombia. *Rev Panam Salud*  
433 *Publica* [Internet]. 2013;34(2):135–6. Available from: [www.scielosp.org/scielo.php?](http://www.scielosp.org/scielo.php?script=sci_arttext&pid=S1020-49892013000800009&lng=en&nrm=iso&tlng=en)  
434 [script=sci\\_arttext&pid=S1020-49892013000800009&lng=en&nrm=iso&tlng=en](http://www.scielosp.org/scielo.php?script=sci_arttext&pid=S1020-49892013000800009&lng=en&nrm=iso&tlng=en)
43515. Banerjee S. Spatial Data Analysis. *Annu Rev Public Health* [Internet]. 2016;47–59.  
436 Available from: [https://www.annualreviews.org/doi/pdf/10.1146/annurev-publhealth-](https://www.annualreviews.org/doi/pdf/10.1146/annurev-publhealth-032315-021711)  
437 [032315-021711](https://www.annualreviews.org/doi/pdf/10.1146/annurev-publhealth-032315-021711)
43816. Departamento Administrativo Nacional de Estadística (DANE). Datos Abiertos  
439 Cartografía y Geografía \_ GEOPORTAL. Open Data Cartography and Geography \_  
440 GEOPORTAL [Internet]. 2018. Available from:  
441 <https://geoportal.igac.gov.co/es/contenido/datos-abiertos-cartografia-y-geografia>
44217. Departamento Administrativo Nacional de Estadística (DANE). Atlas estadístico.  
443 Statistical atlas. 1st ed. Bustamente J, Jaramillo C, Cárdenas MA, Acevedo L, Freire E,  
444 Gutiérrez C, editors. Bogotá D.C.: Departamento Administrativo Nacional de Estadística;  
445 2012. 1-178 p.
44618. Instituto Nacional de Salud. Protocolo de Vigilancia en Salud Pública. Rabia en humanos,

- 447       perros y gatos. Rabies in Humans, dogs and cats [Internet]. versión 01. Grupo de  
448       enfermedades transmisibles. Bogota D.C.; 2014. 20-26 p. Available from:  
449       <http://www.ins.gov.co/lineas-de-accion/Subdireccion-Vigilancia/sivigila/Protocolos>  
450       SIVIGILA/PRO Hepatitis A.pdf
45119.    Departamento de asuntos Económicos y Sociales de las Naciones Unidas. Clasificación  
452       Industrial Internacional Uniforme De Todas Las Actividades Económicas. International  
453       Standard Industrial Classification of All Economic Activities [Internet]. Vols. 130, 160,  
454       Revisión 4 adaptada para Colombia CIU Rev. 4 A.C. 2009. p. 1–346. Available from:  
455       [http://unstats.un.org/unsd/publication/seriesM/seriesm\\_4rev4s.pdf](http://unstats.un.org/unsd/publication/seriesM/seriesm_4rev4s.pdf)
45620.    Departamento Administrativo Nacional de Estadística (DANE). Proyecciones de  
457       población. Population projections [Internet]. Vol. 53, Latin America and the Caribbean  
458       Demographic Observatory. 2015. p. 144. Available from:  
459       [https://www.dane.gov.co/index.php/estadisticas-por-tema/demografia-y-poblacion/](https://www.dane.gov.co/index.php/estadisticas-por-tema/demografia-y-poblacion/proyecciones-de-poblacion)  
460       proyecciones-de-poblacion
46121.    Recuenco S, Blanton JD, Rupprecht CE. A Spatial Model to Forecast Raccoon Rabies  
462       Emergence. Vector-Borne and Zoonotic Diseases [Internet]. 2012;12(2):126–37. Available  
463       from: <http://online.liebertpub.com/doi/abs/10.1089/vbz.2010.0053>
46422.    ESRI. How Cluster and Outlier Analysis (Anselin Local Moran’s I) works—ArcGIS Pro |  
465       ArcGIS Desktop [Internet]. Ersi Arc GIS. 2017. Available from:  
466       [http://pro.arcgis.com/en/pro-app/tool-reference/spatial-statistics/h-how-cluster-and-outlier-](http://pro.arcgis.com/en/pro-app/tool-reference/spatial-statistics/h-how-cluster-and-outlier-analysis-anselin-local-m.htm)  
467       analysis-anselin-local-m.htm
46823.    Cardoso-dos-Santos AC, Boquett J, Zagonel de Oliveira M, Callegari-Jacques SM,

- 469 Barbian MH, Sanseverino MTV, et al. Twin Peaks: A spatial and temporal study of  
470 twinning rates in Brazil. PLoS ONE. 2018;13(7):1–14.
47124. Ministerio de Salud y Protección Social (MSPS). Coberturas de Vacunación Antirrábica  
472 por Departamentos. Anti-Rabies Dog Vaccination by Departments [Internet]. Bogotá D.C.;  
473 2017. Available from:  
474 [www.minsalud.gov.co/sites/rid/Lists/BibliotecaDigital/RIDE/VS/PP/SA/Cobertura-  
vacunacion-antirrabica-departamentos-2016.pdf](http://www.minsalud.gov.co/sites/rid/Lists/BibliotecaDigital/RIDE/VS/PP/SA/Cobertura-<br/>475 vacunacion-antirrabica-departamentos-2016.pdf)
47625. Cediel N, de la Hoz F, Villamil LC, Romero J, Díaz A. Epidemiología de la rabia canina  
477 en Colombia. The epidemiology of canine rabies in Colombia. Revista de Salud Pública.  
478 2010;12(3):368–79.
47926. Instituto Colombiano Agropecuario. Epidemiología rabia silvestre. Wild rabies  
480 epidemiology. [Internet]. Bogota D.C.; 2018. Available from:  
481 [https://www.ica.gov.co/areas/pecuaria/servicios/enfermedades-animales/rabia-silvestre-1/  
epidemiologia-rabia-silvestre.aspx](https://www.ica.gov.co/areas/pecuaria/servicios/enfermedades-animales/rabia-silvestre-1/<br/>482 epidemiologia-rabia-silvestre.aspx)
48327. Ministerio de Salud y Protección Social (MSPS). Desafíos de la vigilancia de la rabia en  
484 Colombia. Challenges of rabies surveillance in Colombia.[Internet]. Bogota D.C.; 2017.  
485 Available from:  
486 [http://panaftosa.org/redipra16/dmdocuments/SEMINARIO\\_Redipra16\\_JairoMarquez\\_Col  
ombia.pdf](http://panaftosa.org/redipra16/dmdocuments/SEMINARIO_Redipra16_JairoMarquez_Col<br/>487 ombia.pdf)
48828. Departamento Administrativo Nacional de Estadística (DANE). Visibilización estadística  
489 de los grupos étnicos colombianos. Statistical visibility of Colombian ethnic groups  
490 [Internet]. Bogotá D.C.; 2010. Available from:

- 491 [http://www.dane.gov.co/files/censo2005/etnia/sys/visibilidad\\_estadistica\\_etnicos.pdf](http://www.dane.gov.co/files/censo2005/etnia/sys/visibilidad_estadistica_etnicos.pdf)
49229. Departamento Administrativo Nacional de Estadística (DANE). Pobreza Monetaria y  
493 Multidimensional en Colombia. Monetary and Multidimensional Poverty in Colombia  
494 [Internet]. Colombia; 2017. Available from:  
495 [https://www.dane.gov.co/files/investigaciones/condiciones\\_vida/pobreza/  
496 bol\\_pobreza\\_17.pdf](https://www.dane.gov.co/files/investigaciones/condiciones_vida/pobreza/bol_pobreza_17.pdf)
49730. OMS. Mordeduras de animales. Animal bites [Internet]. 2019. Available from:  
498 [www.who.int/es/news-room/fact-sheets/detail/animal-bites](http://www.who.int/es/news-room/fact-sheets/detail/animal-bites)
49931. Badillo R, Mantilla JC, Pradilla G. Encefalitis rábica humana por mordedura de  
500 murciélago en un área urbana de Colombia. Human rabies encephalitis by a vampire bat  
501 bite in an urban area of Colombia. *Biomédica* [Internet]. 2009;(1):191–203. Available  
502 from: [www.revistabiomedica.org/index.php/biomedica/article/view/21/303](http://www.revistabiomedica.org/index.php/biomedica/article/view/21/303)
50332. Mauricio M, Claro B, Alejandro A, Álvarez Á, José E, Carrascal B, et al. Infectio  
504 Asociación Colombiana de Infectología Encefalitis rábica humana secundaria a mordedura  
505 por gato infectado por un virus rábico de origen silvestre. *Encephalitis Due to Rabies  
506 Secondary to the Bite of a Cat Infected With a Rabies Virus of Origen Silvester.*  
507 2013;17(3):167–70. Available from:  
508 <https://www.sciencedirect.com/science/article/pii/S0123939213707252>
50933. Mantilla JC, Pradilla G. Forma paralitica de un caso de rabia humana. Paralytic form of a  
510 case of human rabies transmitted by bat, simulated Guillain Barre Syndrome: Presentation  
511 of an autopsy case. *Revista Salud UIS* [Internet]. 2010;42(2):139–51. Available from:  
512 <https://revistas.uis.edu.co/index.php/revistasaluduis/article/view/1419/1825>

51334. Fahl WO, Isabel A, Garcia E, Achkar SM, Mori E, Asano KM, et al. Rabies Transmitted  
514 by Bats in Brazil. *Acta Biol Colomb* [Internet]. 2015;20(3):21–35. Available from: [http://](http://www.scielo.org.co/pdf/abc/v20n3/v20n3a02.pdf)  
515 [www.scielo.org.co/pdf/abc/v20n3/v20n3a02.pdf](http://www.scielo.org.co/pdf/abc/v20n3/v20n3a02.pdf)
51635. Shlomo An, Lamson-Hall P, Galarza N, Blei A. Atlas de expansión urbana Colombia.  
517 Atlas of Colombia urban expansion. Bogota D.C.: Dirección Nacional de Planeación;  
518 2017. 244 p.
51936. Salguero M, Rubiano N, Gonzales A, Lulle T, Bodnar Y, Velasquez S, et al. Ciudad ,  
520 espacio y población : el proceso de urbanización en Colombia. City, space and population:  
521 the urbanization process in Colombia. [Internet]. Bogotá: Universidad Externado de  
522 Colombia; 2007. 4-70 p. Available from:  
523 [www.uexternado.edu.co/wp-content/uploads/2017/04/Ciudad\\_espacio\\_y\\_poblacion.\\_El\\_p](http://www.uexternado.edu.co/wp-content/uploads/2017/04/Ciudad_espacio_y_poblacion._El_p)  
524 [roceso\\_de-Urbanizacion.pdf](http://www.uexternado.edu.co/wp-content/uploads/2017/04/Ciudad_espacio_y_poblacion._El_p)
52537. Federación Nacional de Ganaderos. Inventario Ganadero. Livestock Inventory [Internet].  
526 2017. p. 1. Available from: <http://www.fedegan.org.co/estadisticas/inventario-ganadero>
52738. Food and Agriculture Organization. Nota de Análisis Sectorial Agricultura y Desarrollo  
528 Rural. Sectoral Analysis Note on Agriculture and Rural Development [Internet].  
529 Colombia; 2012. Available from: <http://www.fao.org/3/a-ak167s.pdf>
53039. Ministerio de Salud y Protección Social. Desafíos de la rabia silvestre en Colombia.  
531 Challenges of wild rabies in Colombia [Internet]. Colombia; 2017. Available from:  
532 [http://panaftosa.org/redipra16/dmdocuments/REDRIPRA\\_16\\_JairoHernandez\\_minsalud-](http://panaftosa.org/redipra16/dmdocuments/REDRIPRA_16_JairoHernandez_minsalud-)  
533 [Colombia.pdf](http://panaftosa.org/redipra16/dmdocuments/REDRIPRA_16_JairoHernandez_minsalud-)
53440. Instituto Colombiano Agropecuario (ICA). Boletines epidemiológicos Anuales. Annual  
59  
60

- 535 Epidemiological Bulletins [Internet]. Colombia; 2018. Available from:  
536 [https://www.ica.gov.co/areas/pecuaria/servicios/epidemiologia-veterinaria/bol/epi/  
537 boletines-anuales](https://www.ica.gov.co/areas/pecuaria/servicios/epidemiologia-veterinaria/bol/epi/boletines-anuales)
53841. Zamora Turriago A. Análisis del proceso de implementación para la aplicación del  
539 esquema pre-exposición antirrábico humano dirigido a poblaciones dispersas de difícil  
540 acceso en cinco departamentos de Colombia, 2012-2013. Analysis of implementation  
541 process of application of the human anti-rabies pre-exposure scheme aimed at dispersed  
542 populations of difficult access in five departments of Colombia, 2012-2013 [Internet].  
543 [Bogotá D.C.]: Universidad de la Salle; 2015. Available from:  
544 [http://repository.lasalle.edu.co/bitstream/handle/10185/17914/14062037\\_2015.pdf?  
545 sequence=1&isAllowed=y](http://repository.lasalle.edu.co/bitstream/handle/10185/17914/14062037_2015.pdf?sequence=1&isAllowed=y)
54642. Ministerio de Salud y Protección Social (MSPS). Prevención, vigilancia y control de la  
547 Rabia en Colombia. Prevention, surveillance and control of rabies in Colombia. [Internet].  
548 Bogota D.C.; 2015. Available from:  
549 [http://www.panaftosa.org/redipra15/dmdocuments/REDIPRA15\\_Colombia\\_Jairo  
550 Hernandez\\_6.1.pdf](http://www.panaftosa.org/redipra15/dmdocuments/REDIPRA15_Colombia_JairoHernandez_6.1.pdf)
55143. MSPS, OPS. Modelo de estrategia de vigilancia , prevención y control de la rabia silvestre  
552 en comunidades de alto riesgo. Model of surveillance strategy, prevention and control of  
553 wild rabies in high-risk communities [Internet]. Ministerio de Salud Colombia, Convenio  
554 cooperación técnica no. 485/10 Colombia; 2012 p. 1–110. Available from:  
555 [https://www.minsalud.gov.co/sites/rid/Lists/BibliotecaDigital/RIDE/VS/PP/SA/Modelo-  
556 estrategia-prevencion-vigilancia-control-rabia-silvestre-comunidades-alto-riesgo.pdf](https://www.minsalud.gov.co/sites/rid/Lists/BibliotecaDigital/RIDE/VS/PP/SA/Modelo-estrategia-prevencion-vigilancia-control-rabia-silvestre-comunidades-alto-riesgo.pdf)
